# Supplementary material
Source: PubMed Central journal article supplement (PMC3143240)

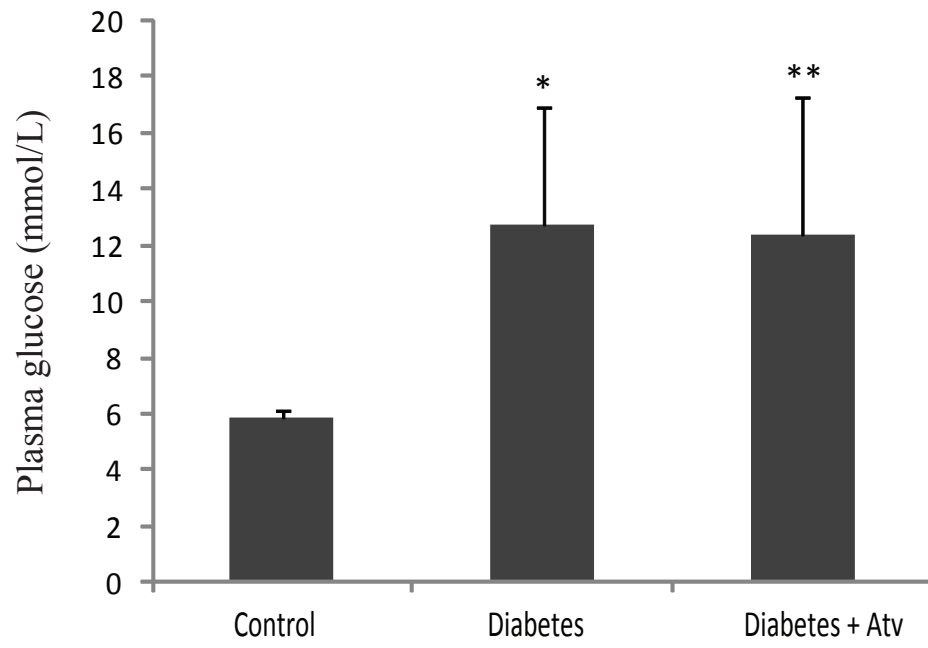

Figure S1

Supplement: NIHMS301479-supplement-01.pdf [file NIHMS301479-supplement-01.pdf]
